# Supplementary material for: The evolutionary history of LysM-RLKs (LYKs/LYRs) in wild tomatoes
Source: PubMed Central journal article supplement (PMC6625017; doi:10.1186/s12862-019-1467-3), 2019-07-11
Supplement: 12862_2019_1467_MOESM1_ESM.pdf [file 12862_2019_1467_MOESM1_ESM.pdf]

Supplemental Table S1: Sources for protein sequences used in LysM-RLK phylogeny analysis

| Name    | Alt Name | Locus ID        | GenBank    | Source | Database     |
|---------|----------|-----------------|------------|--------|--------------|
| AtLYK1  | AtCERK1  | At3g21630       |            | [12]   | TAIR10 [13]  |
| AtLYK2  |          | At3g01840       |            | [12]   | TAIR10 [13]  |
| AtLYK3  |          | At1g51940       |            | [12]   | TAIR10 [13]  |
| AtLYK4  |          | At2g23770       |            | [12]   | TAIR10 [13]  |
| AtLYK5  |          | At2g33580       |            | [12]   | TAIR10 [13]  |
| LjNFR1  |          |                 | CAE02589.1 | [11]   | [14]         |
| LjNFR5  |          |                 | CAE02597.1 | [11]   | [14]         |
| LjLYS1  |          |                 | AB503681   | [11]   | [14]         |
| LjLYS2  |          |                 | AB503682   | [11]   | [14]         |
| LjLYS3  |          |                 | AB503683   | [11]   | [14]         |
| LjLYS4  |          |                 | AB503684   | [11]   | [14]         |
| LjLYS5  |          |                 | AB503686   | [11]   | [14]         |
| LjLYS6  |          |                 | AB503687   | [11]   | [14]         |
| LjLYS7  |          |                 | AB503688   | [11]   | [14]         |
| LjLYS11 |          |                 | AB503689   | [11]   | [14]         |
| LjLYS12 |          |                 | AB503690   | [11]   | [14]         |
| LjLYS13 |          |                 | AB503691   | [11]   | [14]         |
| LjLYS14 |          |                 | AB503692   | [11]   | [14]         |
| LjLYS15 |          |                 | AB503693   | [11]   | [14]         |
| LjLYS16 |          |                 | AB503694   | [11]   | [14]         |
| LjLYS20 |          |                 | AB503695   | [11]   | [14]         |
| LjLYS21 |          |                 | AB503696   | [11]   | [14]         |
| MtNFP   | MtNFR5   | Medtr5g019040.1 |            | [10]   | Mt4.0v2 [15] |
| MtLYK1  |          | Medtr5g086540.1 |            | [10]   | Mt4.0v2 [15] |
| MtLYK2  |          | Medtr5g086310.1 |            | [10]   | Mt4.0v2 [15] |
| MtLYK3  |          | Medtr5g086130.1 |            | [10]   | Mt4.0v2 [15] |
| MtLYK4  |          | Medtr5g086120.1 |            | [10]   | Mt4.0v2 [15] |
| MtLYK5  |          | Medtr5g086090.1 |            | [10]   | Mt4.0v2 [15] |
| MtLYK6  |          | Medtr5g086040.1 |            | [10]   | Mt4.0v2 [15] |
| MtLYK7  |          | Medtr5g086030.1 |            | [10]   | Mt4.0v2 [15] |
| MtLYK8  |          | Medtr2g024290.1 |            | [10]   | Mt4.0v2 [15] |
| MtLYK9  |          | Medtr3g080050.1 |            | [10]   | Mt4.0v2 [15] |
| MtLYK10 |          | Medtr5g033490.1 |            | [10]   | Mt4.0v2 [15] |
| MtLYR1  |          | Medtr8g078300.1 |            | [10]   | Mt4.0v2 [15] |
| MtLYR2  |          | Medtr1g021845.1 |            | [10]   | Mt4.0v2 [15] |
| MtLYR3  |          | Medtr5g019050.1 |            | [10]   | Mt4.0v2 [15] |
| MtLYR4  |          | Medtr5g085790.1 |            | [10]   | Mt4.0v2 [15] |
| MtLYR5  |          | Medtr7g079350.1 |            | [10]   | Mt4.0v2 [15] |
| MtLYR6  |          | Medtr7g079320.1 |            | [10]   | Mt4.0v2 [15] |
| MtLYR7  |          | Medtr3g080170.1 |            | [10]   | Mt4.0v2 [15] |
| OsLYK1  |          | LOC_Os01g36550  |            | [12]   | TIGR7 [16]   |

|                |      |                    |  |      |              |
|----------------|------|--------------------|--|------|--------------|
| <b>OsLYK2</b>  |      | LOC_Os06g41980     |  | [12] | TIGR7 [16]   |
| <b>OsLYK3</b>  |      | LOC_Os06g41960     |  | [12] | TIGR7 [16]   |
| <b>OsLYK4</b>  |      | LOC_Os02g09960     |  | [12] | TIGR7 [16]   |
| <b>OsLYK5</b>  |      | LOC_Os03g13080     |  | [12] | TIGR7 [16]   |
| <b>OsLYK6</b>  |      | LOC_Os11g35330     |  | [12] | TIGR7 [16]   |
| <b>SILYK1</b>  | Bti9 | Solyc07g049180.2.1 |  | [17] | ITAG2.4 [18] |
| <b>SILYK2</b>  |      | Solyc02g094010.1.1 |  | [17] | ITAG2.4 [18] |
| <b>SILYK3</b>  |      | Solyc03g121050.2.1 |  | [17] | ITAG2.4 [18] |
| <b>SILYK4</b>  |      | Solyc02g089900.1.1 |  | [17] | ITAG2.4 [18] |
| <b>SILYK6</b>  |      | Solyc12g089020.1.1 |  | [17] | ITAG2.4 [18] |
| <b>SILYK7</b>  |      | Solyc02g089920.1.1 |  | [17] | ITAG2.4 [18] |
| <b>SILYK8</b>  |      | Solyc09g083200.2.1 |  | [17] | ITAG2.4 [18] |
| <b>SILYK9</b>  |      | Solyc09g083210.2.1 |  | [17] | ITAG2.4 [18] |
| <b>SILYK10</b> |      | Solyc02g065520.1.1 |  | [17] | ITAG2.4 [18] |
| <b>SILYK11</b> |      | Solyc02g081040.2.1 |  | [17] | ITAG2.4 [18] |
| <b>SILYK12</b> |      | Solyc02g081050.2.1 |  | [17] | ITAG2.4 [18] |
| <b>SILYK13</b> |      | Solyc01g098410.2.1 |  | [17] | ITAG2.4 [18] |
| <b>SILYK14</b> |      | Solyc06g069610.1.1 |  | [17] | ITAG2.4 [18] |
| <b>SILYK15</b> |      | Solyc11g069630.1.1 |  | [9]  | ITAG2.4 [18] |

All amino acid sequences analyzed in this study were obtained from publicly available databases as indicated in the database column. Citations (indicated in brackets) are available in the main text.
